# Supplementary material for: rbcL and matK Earn Two Thumbs Up as the Core DNA Barcode for Ferns
Source: PLoS One. 2011 Oct 20;6(10):e26597. doi: 10.1371/journal.pone.0026597 (PMC3197659; doi:10.1371/journal.pone.0026597)
Supplement: Table S2 — List of the taxa, samples, and GenBank accession used in this study, with separate sub-tables for the large-scale, Cheilanthes marginata group, and Deparia datasets. (XLS) [file pone.0026597.s002.xls]

## Sheet: Table S2a Large-scale
Table S2a. The taxa and GenBank accession used in the large-scale loci comparisons. Classification follows Smith et al. 2006
Order	matK			rbcL			trnH-psbA			trnL-F
Family	Taxon	Citation	GenBank	Taxon	Citation	GenBank	Taxon	Citation	GenBank	Taxon	Citation	GenBank
Equisetales
Equisetaceae	Equisetum ramosissimum Desf.	Kuo et al. (2011)	JF303895	Equisetum ramosissimum Desf.	Ebihara et al. (2010)	AB574688	Equisetum ramosissimum Desf.	Ebihara et al. (2010)	AB575350	Equisetum ramosissimum Desf.	Des Marais et al. (2003)	AY226115
	Equisetum arvense L.	Hausner et al. (2006)	AY348551	Equisetum arvense L.	Ebihara et al. (2010)	AB574683	Equisetum arvense L.	Ebihara et al. (2010)	AB575346	Equisetum arvense L.	Karol et al. (2010)	GU191334
Psilotales
Psilotaceae	Psilotum nudum (L.) P. Beauv.	Wakasuki et al. (1998)	NC_003386	Psilotum nudum (L.) P. Beauv.	Ebihara et al. (2010)	AB574682	Psilotum nudum (L.) P. Beauv.	Ebihara et al. (2010)	AB575345	-
Ophioglossales
Ophioglossaceae	Ophioderma pendula (L.) C. Presl	Kuo et al. (2011)	JF303896	Ophioderma pendula (L.) C. Presl	Ebihara et al. (2010)	AB574677	Ophioderma pendula (L.) C. Presl	Ebihara et al. (2010)	AB575341	-
	Botrychium formosanum Tagawa	Kuo et al. (2011)	JF303897	Botrychium formosanum Tagawa	Ebihara et al. (2010)	AB574662	Botrychium formosanum Tagawa	Ebihara et al. (2010)	AB575328	-
Marattiales
Marattiaceae	Danaea elliptica Sm.	Kuo et al. (2011)	JF303894	Danaea elliptica Sm.	Hauk et al. (2003)	AY138398	Danaea elliptica Sm.	This study	JN575767	Danaea media Liebm.	Christenhusz et al. (2008)	EU221845
	Angiopteris evecta (J.R. Forst.) Hoffmann	Roper et al. (2007)	NC_008829	Angiopteris evecta (J.R. Forst.) Hoffmann	Roper et al. (2007)	NC_008829	Angiopteris evecta (J.R. Forst.) Hoffmann	Roper et al. (2007)	NC_008829	Angiopteris evecta (J.R. Forst.) Hoffmann	Roper et al. (2007)	NC_008829
Osmundales
Osmundaceae	Osmundastrum cinnamomeum (L.) C. Presl	Duffy et al. (2009)	EU223823	Osmundastrum cinnamomeum (L.) C. Presl	Ebihara et al. (2010)	AB574700	Osmundastrum cinnamomeum (L.) C. Presl	This study	JN575776	Osmundastrum cinnamomeum (L.) C. Presl	Metzgar et al. (2008)	EF588820
	Osmunda japonica Thunb.	Kuo et al. (2011)	JF303900	Osmunda japonica Thunb.	Ebihara et al. (2010)	AB574698	Osmunda lancea Thunb.	Ebihara et al. (2010)	AB575360	Osmunda japonica Thunb.	Metzgar et al. (2008)	EF588811
Hymenophyllales
Hymenophyllaceae	Vandenboschia radicans (Sw.) Copel.	Kuo et al. (2011)	JF303901	Vandenboschia radicans (Sw.) Copel.	Ebihara et al. (2005)	AB196367	Vandenboschia birmanica (Bedd.) Ching	Ebihara et al. (2010)	AB575378	-
	Hymenophyllum polyanthos (Sw.) Sw.	Kuo et al. (2011)	JF303898	Hymenophyllum polyanthos (Sw.) Sw.	Ebihara et al. (2010)	AB574722	Hymenophyllum polyanthos (Sw.) Sw.	Ebihara et al. (2010)	AB575375	-
Gleicheniales
Gleicheniaceae	Gleichenia japonica Spreng.	Wolf et al. (2010)	HM021798	Gleichenia japonica Spreng.	Ebihara et al. (2010)	AB574728	Gleichenia japonica Spreng.	Ebihara et al. (2010)	AB575385	Diplopterygium bancroftii (Hook.) A.R. Sm.	Metzgar et al. (2008)	EF588800
	Dicranopteris linearis (Burm. f.) Underw.	Kuo et al. (2011)	JF303902	Dicranopteris linearis (Burm. f.) Underw.	Ebihara et al. (2010)	AB574727	Dicranopteris linearis (Burm. f.) Underw.	Ebihara et al. (2010)	AB575384	Dicranopteris linearis (Burm. f.) Underw.	Perrie et al. (2007)	DQ910512
Dipteridaceae	Cheiropleuria integrifolia (D. C. Eaton ex Hook) M. Kato, Y. Yatabe, Sahashi & N. Murak.	Kuo et al. (2011)	JF303904	Cheiropleuria integrifolia (D. C. Eaton ex Hook) M, Kato, Y. Yatabe, Sahashi & N. Murak.	Ebihara et al. (2010)	AB574730	Cheiropleuria integrifolia (D. C. Eaton ex Hook) M, Kato, Y. Yatabe, Sahashi & N. Murak.	Ebihara et al. (2010)	AB575387	-
Matoniaceae	Matonia pectinata R. Br.	Kuo et al. (2011)	JF303903	Matonia pectinata R. Br.	Rai and Graham (2010)	EU352307	Matonia pectinata R. Br.	This study	JN575773	Matonia pectinata R. Br.	Metzgar et al. (2008)	EF588803
Schizaeales
Lygodiaceae	Lygodium japonicum (Thunb.) Sw.	Duffy et al. (2009)	EU223821	Lygodium japonicum (Thunb.) Sw.	Ebihara et al. (2010)	AB574732	Lygodium japonicum (Thunb.) Sw.	Ebihara et al. (2010)	AB575389	Lygodium japonicum (Thunb.) Sw.	Madeira et al. (2008)	DQ845234
Schizaeaceae	Schizaea dichotoma (L.) J. Sm.	Kuo et al. (2011)	JF303899	Schizaea dichotoma (L.) J. Sm.	Ebihara et al. (2010)	AB574734	Schizaea digitata (L.) Sw.	Ebihara et al. (2010)	AB575391	-
Anemiaceae	Anemia phyllitidis (L.) Sw.	Kuo et al. (2011)	JF303905	Anemia phyllitidis (L.) Sw.	Wikström et al. (2002)	AJ303391	Anemia phyllitidis (L.) Sw.	This study	JN575763	Anemia phyllitidis (L.) Sw.	Madeira et al. (2008)	DQ845242
Salviniales
Marsileaceae	Marsilea mutica Mett.	Duffy et al. (2009)	EU223822	Marsilea quadrifolia L.	Ebihara et al. (2010)	AB574737	Marsilea quadrifolia L.	Ebihara et al. (2010)	AB575393	Marsilea mutica Mett.	Nagalingum et al. (2007)	DQ643374
Salviniaceae	Salvinia molesta D. S. Mitch.	Kuo et al. (2011)	JF303906	Salvinia natans (L.) All.	Ebihara et al. (2010)	AB574740	Salvinia natans (L.) All.	Ebihara et al. (2010)	AB575396	Salvinia molesta D. S. Mitch.	Nagalingum et al. (2008)	EU269689
Cyatheales
Loxomataceae	Loxoma cunninghamii R. Br.	Kuo et al. (2011)	JF303912	Loxoma cunninghamii R. Br.	Pryer et al. (2004)	AY612679	Loxoma cunninghamii R. Br.	This study	JN575772	-
Plagiogyriaceae	Plagiogyria euphlebia (Kunze) Mett.	Kuo et al. (2011)	JF303911	Plagiogyria euphlebia (Kunze) Mett.	Ebihara et al. (2010)	AB574743	Plagiogyria euphlebia (Kunze) Mett.	Ebihara et al. (2010)	AB575399	-
Culcitaceae	Culcita macrocarpa C. Presl	Kuo et al. (2011)	JF303913	Culcita macrocarpa C. Presl	Korall et al. (2006)	AM177334	Culcita macrocarpa C. Presl	This study	JN575765	-
Thyrsopteridaceae	Thyrsopteris elegans Kunze	Kuo et al. (2011)	JF303910	Thyrsopteris elegans Kunze	Korall et al. (2006)	AM177353	Thyrsopteris elegans Kunze	This study	JN575779	-
Metaxyaceae	Metaxya lanosa A. R. Sm. & Tuomisto	Kuo et al. (2011)	JF303909	Metaxya lanosa A. R. Sm. & Tuomisto	Smith et al. (2001)	AF317701	Metaxya lanosa A. R. Sm. & Tuomisto	This study	JN575774	-
Dicksoniaceae	Dicksonia antarctica Labill.	Duffy et al. (2009)	EU223820	Dicksonia antarctica Labill.	Wolf et al. (1994)	U05919	Dicksonia antarctica Labill.	This study	JN575768	Dicksonia antarctica Labill.	Korall et al. (2007)	AM410355
Cibotiaceae	Cibotium barometz (L.) J. Sm.	Kuo et al. (2011)	JF303908	Cibotium barometz (L.) J. Sm.	Ebihara et al. (2010)	AB574749	Cibotium barometz (L.) J. Sm.	Ebihara et al. (2010)	AB575405	Cibotium barometz (L.) J. Sm.	Su et al. (2005)	AY142482
Cyatheaceae	Alsophila podophylla Hook.	Kuo et al. (2011)	JF303907	Alsophila podophylla Hook.	Ebihara et al. (2010)	AB574756	Alsophila spinulosa (Wall. ex Hook.) R.M. Tryon	Ebihara et al. (2010)	AB575412	Alsophila podophylla Hook.	Su et al. (2005)	AY142478
Polypodiales
Lindsaeaceae	Odontosoria chinensis (L.) J. Sm.	Kuo et al. (2011)	JF303915	Odontosoria chinensis (L.) J. Sm.	Ebihara et al. (2010)	AB574773	Odontosoria chinensis (L.) J. Sm.	Ebihara et al. (2010)	AB575428	-
Saccolomataceae	Saccoloma inaequale (Kunze) Mett.	Kuo et al. (2011)	JF303914	Saccoloma inaequale (Kunze) Mett.	Schuettpelz and Pryer (2007)	EF463265	Saccoloma inaequale (Kunze) Mett.	This study	JN575777	-
Dennstaedtiaceae	Pteridium aquilinum (L.) Kuhn	Duffy et al. (2009)	EU223824	Pteridium aquilinum (L.) Kuhn	Ebihara et al. (2010)	AB574793	Pteridium aquilinum (L.) Kuhn	Ebihara et al. (2010)	AB575448	Pteridium aquilinum (L.) Kuhn	Der et al. unpublished	NC_014348
	Dennstaedtia scabra (Wall. ex Hook.) T. Moore	Kuo et al. (2011)	JF303916	Dennstaedtia scabra (Wall. ex Hook.) T. Moore	Ebihara et al. (2010)	AB574778	Dennstaedtia scabra (Wall. ex Hook.) T. Moore	Ebihara et al. (2010)	AB575433	-
	Monachosorum henryi Christ	Kuo et al. (2011)	JF303917	Monachosorum arakii Tagawa	Ebihara et al. (2010)	AB574790	Monachosorum arakii Tagawa	Ebihara et al. (2010)	AB575445	-
Pteridaceae	Coniogramme japonica (Thunb.) Diels	Kuo et al. (2011)	JF303920	Coniogramme japonica (Thunb.) Diels	Ebihara et al. (2010)	AB574813	Coniogramme japonica (Thunb.) Diels	Ebihara et al. (2010)	AB575465	Coniogramme japonica (Thunb.) Diels	Zhang et al. (2007)	DQ432690
	Acrostichum aureum L.	Kuo et al. (2011)	JF303921	Acrostichum aureum L.	Ebihara et al. (2010)	AB574794	Acrostichum aureum L.	Ebihara et al. (2010)	AB575449	Acrostichum aureum L.	Li et al. (2010)	FJ807658
	Pteris fauriei Hieron.	Kuo et al. (2011)	JF303919	Pteris fauriei Hieron.	Ebihara et al. (2010)	AB574830	Pteris fauriei Hieron.	Ebihara et al. (2010)	AB575482	-
	Hemionitis arifolia (Burm. f.) T. Moore	Kuo et al. (2011)	JF303918	Hemionitis arifolia (Burm. f.) T. Moore	Geiger and Ranker (unpublished)	AY357706	Hemionitis arifolia (Burm. f.) T. Moore	This study	JN575771	-
	Adiantum capillus-veneris L.	Wolf et al. (2003)	NC_004766	Adiantum capillus-veneris L.	Ebihara et al. (2010)	AB574796	Adiantum capillus-veneris L.	Ebihara et al. (2010)	AB575450	Adiantum capillus-veneris L.	Wolf et al. (2003)	NC_004766
	Haplopteris taeniophylla (Copel.) E. H. Crane	Kuo et al. (2011)	JF303922	Haplopteris fudzinoi (Makino) E.H. Crane	Ebihara et al. (2010)	AB574819	Haplopteris fudzinoi (Makino) E.H. Crane	Ebihara et al. (2010)	AB575471	-
Dryopteridaceae	Didymochlaena truncatula (Sw.) J. Sm.	Kuo et al. (2011)	JF303942	Didymochlaena truncatula (Sw.) J. Sm.	Kuo et al. (2011)	JF303975	Didymochlaena truncatula (Sw.) J. Sm.	This study	JN575769	Didymochlaena truncatula (Sw.) J. Sm.	Lu and Li, unpublished	DQ514491
	Hypodematium crenatum (Forsk.) Kuhn	Kuo et al. (2011)	JF303944	Hypodematium crenatum (Forsk.) Kuhn	Ebihara et al. (2010)	AB575183	Hypodematium crenatum (Forsk.) Kuhn	Ebihara et al. (2010)	AB575803	-
	Elaphoglossum callifolium (Blume) T. Moore	Kuo et al. (2011)	JF303949	Elaphoglossum yoshinagae (Yatabe) Makino	Ebihara et al. (2010)	AB575182	Elaphoglossum yoshinagae (Yatabe) Makino	Ebihara et al. (2010)	AB575802	-
	Ctenitis eatonii (Baker) Ching	Kuo et al. (2011)	JF303947	Ctenitis eatonii (Baker) Ching	Ebihara et al. (2010)	AB575093	Ctenitis eatonii (Baker) Ching	Ebihara et al. (2010)	AB575719	-
	Dryopteris sparsa (Buch.-Ham. ex D. Don) Kuntze	Kuo et al. (2011)	JF303946	Dryopteris sparsa (Buch.-Ham. ex D. Don) Kuntze	Ebihara et al. (2010)	AB575173	Dryopteris sparsa (Buch.-Ham. ex D. Don) Kuntze	Ebihara et al. (2010)	AB575794	Dryopteris sparsa (Buch.-Ham. ex D. Don) Kuntze	Lu and Li, unpublished	DQ514499
	Cyrtomium falcatum (L. f.) C. Presl	Kuo et al. (2011)	JF303945	Cyrtomium falcatum (L. f.) C. Presl	Ebihara et al. (2010)	AB575102	Cyrtomium falcatum (L. f.) C. Presl	Ebihara et al. (2010)	AB575726	Cyrtomium falcatum (L. f.) C. Presl	Lu et al. (2005)	AY736332
Lomariopsidaceae	Lomariopsis spectabilis (Kunze) Mett.	Kuo et al. (2011)	JF303952	Lomariopsis spectabilis (Kunze) Mett.	Ebihara et al. (2010)	AB575226	Lomariopsis spectabilis (Kunze) Mett.	Ebihara et al. (2010)	AB575841	-
	Cyclopeltis crenata (Fée) C. Chr.	Kuo et al. (2011)	JF303954	Cyclopeltis crenata (Fée) C. Chr.	Li and Lu (2006)	DQ054517	Cyclopeltis crenata (Fée) C. Chr.	This study	JN575766	Cyclopeltis crenata (Fée) C. Chr	Lu and Li, unpublished	DQ514488
	Nephrolepis cordifolia (L.) C. Presl	Kuo et al. (2011)	JF303953	Nephrolepis cordifolia (L.) C. Presl	Ebihara et al. (2010)	AB575228	Nephrolepis cordifolia (L.) C. Presl	Ebihara et al. (2010)	AB575842	-
Tectariaceae	Tectaria zeylanica (Houtt.) Sledge	Kuo et al. (2011)	JF303951	Tectaria zeylanica (Houtt.) Sledge	Schuettpelz and Pryer (2007)	EF463275	Tectaria zeylanica (Houtt.) Sledge	This study	JN575778	-
	Arthropteris palisotii (Desv.) Alston	Kuo et al. (2011)	JF303950	Arthropteris palisotii (Desv.) Alston	Ebihara et al. (2010)	AB575230	Arthropteris palisotii (Desv.) Alston	Ebihara et al. (2010)	AB575844	-
Oleandraceae	Oleandra wallichii (Hook.) C. Presl	Kuo et al. (2011)	JF303955	Oleandra wallichii (Hook.) C. Presl	Tsutsumi and Kato (2005)	AB212687	Oleandra wallichii (Hook.) C. Presl	This study	JN575775	-
Davalliaceae	Araiostegiella perdurans (Christ) M. Kato & Tsutsumi	Kuo et al. (2011)	JF303957	Araiostegiella perdurans (Christ) M. Kato & Tsutsumi	Tsutsumi and Kato (2005)	AB212691	Araiostegiella perdurans (Christ) M. Kato & Tsutsumi	This study	JN575764	-
	Humata repens (L. f.) J. Small ex Diels	Kuo et al. (2011)	JF303956	Humata trifoliata Cav.	Ebihara et al. (2010)	AB575240	Humata trifoliata Cav.	Ebihara et al. (2010)	AB575852	-
Polypodiaceae	Colysis wrightii (Hook.) Ching	Kuo et al. (2011)	JF303959	Colysis wrightii (Hook.) Ching	Ebihara et al. (2010)	AB575247	Colysis pothifolia (Buch.-Ham. ex D. Don) C. Presl	Ebihara et al. (2010)	AB575857	-
	Aglaomorpha meyeniana Schott	Kuo et al. (2011)	JF303958	Aglaomorpha coronans (Wall. ex Mett.) Copel	Ebihara et al. (2010)	AB575241	Aglaomorpha coronans (Wall. ex Mett.) Copel	Ebihara et al. (2010)	AB575853	Aglaomorpha meyeniana Schott	Li et al. (2010)	FJ807657
	Ctenopteris curtisii (Baker) Copel.	Kuo et al. (2011)	JF303960	Ctenopteris kanashiroi (Hayata) K. lwats	Ebihara et al. (2010)	AB575253	Ctenopteris kanashiroi (Hayata) K. lwats	Ebihara et al. (2010)	AB575864	-
Woodsiaceae	Gymnocarpium remote-pinnatum (Hayata) Ching	Kuo et al. (2011)	JF303926	Gymnocarpium dryopteris (L.) Newman	Ebihara et al. (2010)	AB574992	Gymnocarpium dryopteris (L.) Newman	Ebihara et al. (2010)	AB575628	-
	Acystopteris taiwaniana (Tagawa) A. Love & D. Love	Kuo et al. (2011)	JF303925	Acystopteris japonica (Luerss.) Nakai	Ebihara et al. (2010)	AB574893	Acystopteris japonica (Luerss.) Nakai	Ebihara et al. (2010)	AB575538	Acystopteris japonica (Luerss.) Nakai	Wang et al. unpublished	AF515230
	Diplaziopsis javanica (Blume) C. Chr.	Kuo et al. (2011)	JF303928	Diplaziopsis cavaleriana (H. Christ) C. Chr.	Ebihara et al. (2010)	AB574960	Diplaziopsis cavaleriana (H. Christ) C. Chr.	Ebihara et al. (2010)	AB575598	Diplaziopsis cavaleriana (H. Christ) C. Chr.	Wang et al. unpublished	AF515251
	Hemidictyum marginatum (L.) C. Presl	Kuo et al. (2011)	JF303927	Hemidictyum marginatum (L.) C. Presl	Schuettpelz and Pryer (2007)	EF463318	Hemidictyum marginatum (L.) C. Presl	This study	JN575770	-
	Rhachidosorus pulcher (Tagawa) Ching	Kuo et al. (2011)	JF303962	Rhachidosorus mesosorus (Makino) Ching	Ebihara et al. (2010)	AB574996	Rhachidosorus mesosorus (Makino) Ching	Ebihara et al. (2010)	AB575632	Rhachidosorus consimilis Ching	Wang et al. unpublished	AF514837
	Woodsia polystichoides D. C. Eaton	Kuo et al. (2011)	JF303930	Woodsia polystichoides D. C. Eaton	Ebihara et al. (2010)	AB575002	Woodsia polystichoides D. C. Eaton	Ebihara et al. (2010)	AB575637	Woodsia polystichoides D. C. Eaton	Wang et al. (2008)	DQ480129
	Deparia lancea (Thunb.) Fras.-Jenk.	Kuo et al. (2011)	JF303940	Deparia lancea (Thunb.) Fras.-Jenk.	Ebihara et al. (2010)	AB574947	Deparia lancea (Thunb.) Fras.-Jenk.	Ebihara et al. (2010)	AB575585	Deparia lancea (Thunb.) Fras.-Jenk.	Wang et al. unpublished	AF515238
	Athyrium filix-femina (L.) Roth ex Mert.	Kuo et al. (2011)	JF303941	Athyrium distentifolium Tausch ex Opiz	Ebihara et al. (2010)	AB574900	Athyrium distentifolium Tausch ex Opiz	Ebihara et al. (2010)	AB575544	-
Aspleniaceae	Hymenasplenium unilaterale (Lam.) Hayata	Kuo et al. (2011)	JF303924	Asplenium apogamum N. Murak. & Hatan.	Ebihara et al. (2010)	AB574852	Asplenium apogamum N. Murak. & Hatan.	Ebihara et al. (2010)	AB575503	-
	Asplenium tripteropus Nakai	Kuo et al. (2011)	JF303923	Asplenium tripteropus Nakai	Ebihara et al. (2010)	AB574881	Asplenium tripteropus Nakai	Ebihara et al. (2010)	AB575527	Asplenium trichomanes L.	James et al. (2008)	EF645613
Thelypteridaceae	Macrothelypteris torresiana (Gaud.) Ching	Kuo et al. (2011)	JF303931	Macrothelypteris torresiana (Gaud.) Ching	Ebihara et al. (2010)	AB575044	Macrothelypteris torresiana (Gaud.) Ching	Ebihara et al. (2010)	AB575675	-
	Phegopteris connectilis (Michx.) Watt	Kuo et al. (2011)	JF303932	Phegopteris connectilis (Michx.) Watt	Ebihara et al. (2010)	AB575038	Phegopteris connectilis (Michx.) Watt	Ebihara et al. (2010)	AB575669	-
	Thelypteris uraiensis (Rosenst.) Ching	Kuo et al. (2011)	JF303933	Thelypteris uraiensis (Rosenst.) Ching	Ebihara et al. (2010)	AB575048	Thelypteris uraiensis (Rosenst.) Ching	Ebihara et al. (2010)	AB575678	-
	Cyclosorus pozoi (Lag.) C. M. Kuo	Kuo et al. (2011)	JF303934	Cyclosorus pozoi (Lag.) C. M. Kuo	Ebihara et al. (2010)	AB575006	Cyclosorus pozoi (Lag.) C. M. Kuo	Ebihara et al. (2010)	AB575640	-
Onocleaceae	Onoclea sensibilis L.	Kuo et al. (2011)	JF303935	Onoclea sensibilis L.	Ebihara et al. (2010)	AB575064	Onoclea sensibilis L.	Ebihara et al. (2010)	AB575692	-
	Matteuccia struthiopteris (L.) Tod.	Kuo et al. (2011)	JF303936	Matteuccia struthiopteris (L.) Tod.	Ebihara et al. (2010)	AB575062	Matteuccia struthiopteris (L.) Tod.	Ebihara et al. (2010)	AB575690	-
Blechnaceae	Woodwardia japonica (L. f.) Sm.	Kuo et al. (2011)	JF303937	Woodwardia japonica (L. f.) Sm.	Ebihara et al. (2010)	AB575057	Woodwardia orientalis Sw.	Ebihara et al. (2010)	AB575687	Woodwardia japonica (L. f.) Sm.	Shepherd et al. (2007)	DQ683432
	Blechnum orientale L.	Kuo et al. (2011)	JF303938	Blechnum orientale L.	Ebihara et al. (2010)	AB575055	Blechnum orientale L.	Ebihara et al. (2010)	AB575685	-

## Sheet: Table S2b C. marginata group
Table S2b. The taxa and GenBank accession used in the case study of the Cheilanthes marginata group. This group comprises 17 species that will be recognized as a new genus (F.W. Li et al., unpublished), segregating it from the distantly-related Cheilanthes.
Taxon	Voucher (Herbarium acronym)	Collection locality	Fern DNA Database no.1	GenBank accessions
				matK	rbcL	trnH-psbA
Cheilanthes angustifolia Kunth	van Devender 97-1244 (MO)	Sonora, Mexico	4989	JN647719	JN647777	JN647835
Cheilanthes angustifolia Kunth	Rothfels 3109 (DUKE)	Jalisco, Mexico	6541	JN647720	JN647778	JN647836
Cheilanthes angustifolia Kunth	Rothfels 3116 (DUKE)	Jalisco, Mexico	6550	JN647721	JN647779	JN647837
Cheilanthes angustifolia Kunth	Anderson 12567 (NY)	Sinaloa, Mexico	7840	JN647722	JN647780	JN647838
Cheilanthes angustifolia Kunth	McVaugh 17184 (NY)	Jalisco, Mexico	7841	JN647723	JN647781	JN647839
Cheilanthes angustifolia Kunth	Breedlove 20549 (CAS)	Chiapas, Mexico	8003	JN647724	JN647782	JN647840
Cheilanthes apiacea Mickel	Hinton et al. 23441 (TEX)2	Nuevo Leon, Mexico	7879	JN647725	JN647783	JN647841
Cheilanthes arizonica (Maxon) Mickel	Schuettpelz 461 (DUKE)	Arizona, USA	3168	JN647726	JN647784	JN647842
Cheilanthes arizonica (Maxon) Mickel	Koch and Fryxell 89200 (NY)	Jalisco, Mexico	7820	JN647727	JN647785	JN647843
Cheilanthes arizonica (Maxon) Mickel	Breedlove 18570 (NY)	Sinaloa, Mexico	7821	JN647728	JN647786	JN647844
Cheilanthes arizonica (Maxon) Mickel	Tejero-Diez 2839 (NY)	Mexico, Mexico	7823	JN647729	JN647787	JN647845
Cheilanthes chaerophylla (M. Martens & Galeotti) Kunze	Steinmann 4721 (MO)	Michoacan, Mexico	4990	JN647730	JN647788	JN647846
Cheilanthes chaerophylla (M. Martens & Galeotti) Kunze	Rothfels 3110 (DUKE)	Jalisco, Mexico	6542	JN647731	JN647789	JN647847
Cheilanthes chaerophylla (M. Martens & Galeotti) Kunze	McVaugh 16108 (NY)	Colima, Mexico	7842	JN647732	JN647790	JN647848
Cheilanthes chaerophylla (M. Martens & Galeotti) Kunze	Bartholomew 2516 (NY)	Sinaloa, Mexico	7843	JN647733	JN647791	JN647849
Cheilanthes complanata A.R. Sm.	Breedlove 55870 (NY)	Chiapas, Mexico	7819	JN647734	JN647792	JN647850
Cheilanthes complanata A.R. Sm.	Breedlove 40335 (CAS)	Chiapas, Mexico	8000	JN647735	JN647793	JN647851
Cheilanthes cuneata Link	Rothfels 3288 (DUKE)	Oaxaca, Mexico	6680	JN647736	JN647794	JN647852
Cheilanthes cuneata Link	Mickel and Leonard 4881 (NY)	Oaxaca, Mexico	7837	JN647737	JN647795	JN647853
Cheilanthes decomposita (M. Martens & Galeotti) Fée	Rothfels 3119A (DUKE)	Nayarit, Mexico	6555	JN647738	JN647796	JN647854
Cheilanthes decomposita (M. Martens & Galeotti) Fée	Rothfels 3183 (DUKE)	Nayarit, Mexico	6600	JN647739	JN647797	JN647855
Cheilanthes decomposita (M. Martens & Galeotti) Fée	Mickel 6064 (NY)	Oaxaca, Mexico	7838	JN647740	JN647798	JN647856
Cheilanthes decomposita (M. Martens & Galeotti) Fée	McVaugh 16427 (NY)	Nayarit, Mexico	7839	JN647741	JN647799	JN647857
Cheilanthes decurrens Mickel	Seiler 1209 (NY)	El Salvador	7816	JN647742	JN647800	JN647858
Cheilanthes decurrens Mickel	Breedlove 55788 (CAS)	Chiapas, Mexico	8002	JN647743	JN647801	JN647859
Cheilanthes harrisii Maxon	Rothfels 2689 (DUKE)	Heredia, Costa Rica	5574	JN647744	JN647802	JN647860
Cheilanthes harrisii Maxon	Grusz 105 (DUKE)	San Jose, Costa Rica	5581	JN647745	JN647803	JN647861
Cheilanthes hintoniorum Mendenh. & Nesom	Hinton et al 22695 (NY)	Nuevo Leon, Mexico	7813	JN647746	JN647804	JN647862
Cheilanthes hintoniorum Mendenh. & Nesom	Hinton et al 20157 (TEX)	Nuevo Leon, Mexico	7877	JN647747	JN647805	JN647863
Cheilanthes hintoniorum Mendenh. & Nesom	Hinton et al 28587 (TEX)	Nuevo Leon, Mexico	7878	JN647748	JN647806	JN647864
Cheilanthes kaulfussii Kunze	Windham et al. 519 (DUKE)	Morelos, Mexico	4407	JN647749	JN647807	JN647865
Cheilanthes kaulfussii Kunze	Yatskievych and Gastony 89-286 (MO)	Morelos, Mexico	5073	JN647750	JN647808	JN647866
Cheilanthes kaulfussii Kunze	Rothfels 08-022 (DUKE)	San Jose, Costa Rica	5132	JN647751	JN647809	JN647867
Cheilanthes kaulfussii Kunze	Rothfels 2988 (DUKE)	Mexico, Mexico	6462	JN647752	JN647810	JN647868
Cheilanthes kaulfussii Kunze	Larsson 109 (DUKE)	San Luis Potosí, Mexico	6985	JN647753	JN647811	JN647869
Cheilanthes marginata Kunth	Serrano et al. 6089 (MO)	Tarija, Bolivia	4986	JN647754	JN647812	JN647870
Cheilanthes marginata Kunth	Rothfels 08-023 (DUKE)	San Jose, Costa Rica	5133	JN647755	JN647813	JN647871
Cheilanthes marginata Kunth	Rothfels 2693 (DUKE)	Heredia, Costa Rica	5569	JN647756	JN647814	JN647872
Cheilanthes marginata Kunth	Rothfels 2692 (DUKE)	Heredia, Costa Rica	5571	JN647757	JN647815	JN647873
Cheilanthes marginata Kunth	Rothfels 3137 (DUKE)	Jalisco, Mexico	6571	JN647758	JN647816	JN647874
Cheilanthes marginata Kunth	Rothfels 3731 (DUKE)	Pichincha, Ecuador	7443	JN647759	JN647817	JN647875
Cheilanthes marginata Kunth	Ventura 1393 (NY)	Puebla, Mexico	7833	JN647760	JN647818	JN647876
Cheilanthes marginata Kunth	Mickel 7432 (NY)	Oaxaca, Mexico	7834	JN647761	JN647819	JN647877
Cheilanthes marginata Kunth	Boutin and Brandt 2306 (NY)	Jalisco, Mexico	7844	JN647762	JN647820	JN647878
Cheilanthes membranacea Davenp.	Mickel 7431 (NY)	Oaxaca, Mexico	7845	JN647763	JN647821	JN647879
Cheilanthes membranacea Davenp.	Mickel 7057 (NY)	Oaxaca, Mexico	7846	JN647764	JN647822	JN647880
Cheilanthes pellaeopsis Mickel	Breedlove 59767 (CAS)	Oaxaca, Mexico	8001	JN647765	JN647823	JN647881
Cheilanthes pellaeopsis Mickel	Anderson and Laskowski 4394 (NY)	Guerrero, Mexico	7815	JN647766	JN647824	JN647882
Cheilanthes purpusii T. Reeves	Steinmann 2528 (MO)	Queretaro, Mexico	4995	JN647767	JN647825	JN647883
Cheilanthes purpusii T. Reeves	Rothfels 3027 (DUKE)	Hidalgo, Mexico	6486	JN647768	JN647826	JN647884
Cheilanthes pyramidalis Fée	Rothfels 2696 (DUKE)	San Jose, Costa Rica	5582	JN647769	JN647827	JN647885
Cheilanthes pyramidalis Fée	Rothfels 3023 (DUKE)	Hidalgo, Mexico	6482	JN647770	JN647828	JN647886
Cheilanthes pyramidalis Fée	Rothfels 3032 (DUKE)	Hidalgo, Mexico	6490	JN647771	JN647829	JN647887
Cheilanthes pyramidalis Fée	Rothfels 3154 (DUKE)	Jalisco, Mexico	6583	JN647772	JN647830	JN647888
Cheilanthes pyramidalis Fée	Rothfels 3212 (DUKE)	Jalisco, Mexico	6624	JN647773	JN647831	JN647889
Cheilanthes pyramidalis Fée	Breedlove 22395 (NY)	Chiapas, Mexico	7830	JN647774	JN647832	JN647890
Cheilanthes pyramidalis Fée	Mickel and Hellwig 3891 (NY)	Oaxaca, Mexico	7832	JN647775	JN647833	JN647891
Cheilanthes spiculata Mickel	Hinton et al. 6837 (LL, isotype)3	Mexico, Mexico	7880	JN647776	JN647834	JN647892
1http://www.pryerlab.net/DNA_database.shtml
2this voucher is the only non-type specimen
3this species only exists as type specimens

## Sheet: Table S2c Deparia
Table S2c. The taxa and GenBank accession used in the Deparia case study.
Taxon	Voucher (Herbarium acronym)	Collection locality	GenBank accessions
			matK	rbcL	trnH-psbA	trnL-F
Deparia acrostichoides (Sw.) M. Kato	Kuo 120 (TAIF)	Massachusetts, USA	JN673820	JN673929	JN673904	JN673862
Deparia allantodioides (Bedd.) M. Kato	Kuo 475 (TAIF)	Nantou, Taiwan	JN673821	JN673930	JN673905	JN673863
Deparia biserialis (Baker) M. Kato	Shinohara 0810501 (KYO)	Kinabalu, Indonesia	JN673822	JN673931	JN673906	JN673864
Deparia bonincola (Nakai) M. Kato	TNS 774841 (TNS)	Bonin Is., Japan	JN673823	AB574940	AB575578	JN673865
Deparia confluens (Kunze) M. Kato	Cultivated in Koshikawa Botanical Garden	Surnbawa, Indonesia	JN673824	JN673932	JN673907	JN673866
Deparia conilii (Fr. & Sav.) M. Kato	TNS 768165 (TNS)	Hachijo Is., Japan	JN673825	AB574941	AB575579	JN673867
Deparia coreana (H. Christ) M. Kato	TNS 776382 (TNS)	Aomori Pref., Japan	JN673826	AB574942	AB575580	JN673868
Deparia dickasonii M. Kato	Liu 9433 (TAIF)	Yunnan, China	JN673827	JN673933	JN673908	JN673869
Deparia dimorphophylla (Koidz.) M. Kato	TNS 764256 (TAIF)	Kagoshima Pref., Japan	JN673828	AB574943	AB575581	JN673870
Deparia dolosa (H. Christ) M. Kato	Kuo 1315 (TAIF)	Yunnan, China	JN673829	JN673934	JN673909	JN673871
Deparia formosana (Rosenst.) R. Sano	TNS 776380 (TNS)	Yakushima, Japan	JN673830	AB574944	AB575582	JN673872
Deparia japonica (Thunb. ex Murray) M. Kato	TNS 763869 (TNS)	Ibaraki Pref., Japan	JN673831	AB574945	AB575583	JN673873
Deparia kiusiana (Koidz.) M. Kato	TNS 764364 (TNS)	Yoshino-gun, Japan	JN673832	AB574946	AB575584	JN673874
Deparia lancea (Thunb. ex Murray) Fras.-Jenk.	Kuo 1917 (TAIF)	Chongqing, China	JN673833	JN673935	JN673910	JN673875
Deparia lancea (Thunb. ex Murray) Fras.-Jenk.	Kuo 1919 (TAIF)	GreenIs., Taiwan	JN673834	JN673936	JN673911	JN673876
Deparia lancea (Thunb. ex Murray) Fras.-Jenk.	Kuo 1920 (TAIF)	Shizuoka Pref., Japan	JN673835	JN673937	JN673912	JN673877
Deparia lancea (Thunb. ex Murray) Fras.-Jenk.	Kuo 1918 (TAIF)	Iriomote Is., Japan	JN673836	JN673938	JN673913	JN673878
Deparia lancea (Thunb. ex Murray) Fras.-Jenk.	Kuo 1915 (TAIF)	Pashupatinath, Nepal	JN673837	JN673939	JN673914	JN673879
Deparia lancea (Thunb. ex Murray) Fras.-Jenk.	Matsumoto Kr42 (TNS)	Quelpart Is., Korea	JN673838	JN673940	JN673915	JN673880
Deparia lancea (Thunb. ex Murray) Fras.-Jenk.	Kuo 1914 (TAIF)	Taipei, Taiwan	JN673839	JN673941	JN673916	JN673881
Deparia lancea (Thunb. ex Murray) Fras.-Jenk.	Wade 1434 (TAIF)	Dalat, Vietnam	JN673840	JN673942	JN673917	JN673882
Deparia lancea (Thunb. ex Murray) Fras.-Jenk.	Kuo 1921 (TAIF)	Yakushima, Japan	JN673841	JN673943	JN673918	JN673883
Deparia lancea (Thunb. ex Murray) Fras.-Jenk.	Kuo 1916 (TAIF)	Zhejiang, China	JN673842	JN673944	JN673919	JN673884
Deparia longipes (Ching) Shinohara	Cultivated in Taipei Botanic Garden 1593861	Gifu Pref., Japan	JN673843	JN673945	JN673920	JN673885
Deparia longipes (Ching) Shinohara	Kuo 153 (TAIF)	Ilan, Taiwan	JN673844	JN673946	JN673921	JN673886
Deparia longipes (Ching) Shinohara	Shinohara 08011101 (KYO)	Kinabalu, Indonesia	JN673845	JN673947	JN673922	JN673887
Deparia longipes (Ching) Shinohara	Wade 1096 (TAIF)	Java, Indonesia	JN673846	JN673948	JN673923	JN673888
Deparia minamitanii S. Serizawa	TNS 774852 (TNS)	Miyazaki Pref., Japan	JN673847	AB574948	AB575586	JN673889
Deparia okuboana (Makino) M. Kato	TNS 764345 (TNS)	Kamo-gun, Japan	JN673848	AB574949	AB575587	JN673890
Deparia omeiensis (Z.R. Wang) M. Kato	Liu 9671 (TAIF)	Sichuan, China	JN673849	JN673949	JN673924	JN673891
Deparia orientalis (Z.R. Wang & J.J. Chien) T. Nakaike	TNS 763932 (TNS)	Tokyocity, Japan	JN673850	AB574956	AB575594	JN673892
Deparia otomasui (Kurata) S. Serizawa	TNS 764339 (TNS)	Kumamoto Pref., Japan	JN673851	AB574950	AB575588	JN673893
Deparia petersenii (Kuntze) M. Kato	Kuo 1922 (TAIF)	Taipei, Taiwan	JN673852	JN673950	JN673925	JN673894
Deparia pseudo-conilii (S. Serizawa) S. Serizawa	TNS 764016 (TNS)	Iriomote Is., Japan	JN673853	AB574952	AB575590	JN673895
Deparia pterorachis (H. Christ) M. Kato	TNS 766637 (TNS)	Nagano Pref., Japan	JN673854	AB574954	AB575592	JN673896
Deparia pycnosora (H. Christ) M. Kato var. mucilagina M. Kato	TNS 763886 (TNS)	Saitama Pref., Japan	JN673855	AB574957	AB575595	JN673897
Deparia pycnosora (H. Christ) M. Kato var. pycnosora	TNS 765674 (TNS)	Hokkaido, Japan	JN673856	AB574955	AB575593	JN673898
Deparia subfluvialis (Hayata) M. Kato	Kuo 168 (TAIF)	Nantu, Taiwan	JN673857	JN673951	JN673926	JN673899
Deparia subfluvialis (Hayata) M. Kato	Liu 9390 (TAIF)	Yunnan, China	JN673858	JN673952	JN673927	JN673900
Deparia subfluvialis (Hayata) M. Kato	Kuo 579 (TAIF)	Luzon, Philippines	JN673859	JN673953	JN673928	JN673901
Deparia unifurcata (Baker) M. Kato	TNS 766643 (TNS)	Nara Pref., Japan	JN673860	AB574958	AB575596	JN673902
Deparia viridifrons (Makino) M. Kato	TNS 766472 (TNS)	Nara Pref., Japan	JN673861	AB574959	AB575597	JN673903
