# Supplementary material for: rbcL and matK Earn Two Thumbs Up as the Core DNA Barcode for Ferns
Source: PLoS One. 2011 Oct 20;6(10):e26597. doi: 10.1371/journal.pone.0026597 (PMC3197659; doi:10.1371/journal.pone.0026597)
Supplement: Table S3 — List of the primers and PCR conditions used in this study. (XLS) [file pone.0026597.s003.xls]

## Sheet: Table S3a
Table S3a. Primers used in this study.
Cheilanthes marginata group:
Region	Name	Sequence 5' - 3'	Reference
rbcL	ESRBCL1FAS	ATGTCACCACAAACGGAGACTAAAGC	Schuettpelz and Pryer (2007)
	ESRBCL1361RAS	TCAGGACTCCACTTACTAGCTTCACG	Schuettpelz and Pryer (2007)
	ESRBCL628FS	CCATTYATGCGTTGGAGAGATCG	Schuettpelz and Pryer (2007)
	ESRBCL654RS	GAARCGATCTCTCCAACGCAT	Schuettpelz and Pryer (2007)
	FWrbcL500RASH	TTGGCAGATAAGCCCAATTTTGG	This study
	FWrbcL835FASH	GCAGAGACAACGGACTACTTCT	This study
	FWrbcL392FASH	ATTCCTCCTGCTTATTCCAA	This study
	FWrbcL874RASH	CGTGATTTCGTTGTCTATCAATG	This study
matK	FWPtmatKF1AS	AYGAAAGYCRYTTAYGGATCT	This study
	FWPtmatK rAGKAS	CGTATTGTACTYCTATGTTTRCCAGC	This study
	FWPtmatK fEDRASH	ATTCATTCRATRTTTTTATTTHTGGAAGATAGATT	This study
	FWPtmatKR951ASH	GTAATTTCAGACGTGGTTCGTG	This study
	FWPtmatKF867ASH	TCAGGGAACTCGCTACTTCGT	This study
	FWPtmatKR522ASH	ATGCGGAAATGAGACATCT	This study
trnH-psbA	psbA*AS	GTTATGCATGAACGTAATGCTC	Tate and Simpson (2003)
	trnH2*AS	CGCGCATGGTGGATTCACAATCC	Tate and Simpson (2003)
	FWtHpA447S	TTGTTAAAGGGCTCCTCRAATG	This study
Deparia:
Region	Name	Sequence 5' - 3'	Reference
rbcL	F1FAS	ATGTCACCACAAACAGAAACTAAAGCAAGT	Wolf et al. (1994)
	1379RAS	TCACAAGCAGCAGCTAGTTCAGGACTC	Pryer et al. (2001)
matK	Derps16 fSTEA	GAAGAAGGGGCGCAATCAACGGAAAC	This study
	DematK fHVLAS	GATTGCCAAAATCTAGCCACGTTTTAGA	This study
	FERmatK rAGKA	CGTRTTGTACTYYTRTGTTTRCVAGC	Kuo et al. (2011)
	DematK rHTYAS	ACGAAGTTTTGTACGTGTGAA	Rothfels et al. (in press)
trnH-psbA	psbA fVMH*AS	GTTATGCATGAACGTAACGCTCA	This study
	trnH r5573*AS	CGAACGACGGGGATTGAAC	This study
trnL-F	fAS	ATTTGAACTGGTGACACGAG	Taberlet et al. (1991)
	FernLr1AS	GGCAGCCCCCAGATTCAGGGGAACC	This study
*also used in amplification and sequencing trnH-psbA for the large-scale locus comparison
AFor amplification
SFor sequencing
HFor herbarium samples with fragmented DNA

## Sheet: Table S3b
Table S3b. PCR conditions and amplicon size.
Loci	Taxa	Primer pairs	Thermal cycles	Amplicon size
matK	Cheilanthes marginata group	FWPtmatKF1/FWPtmatK rAGK	94 (5 min), [94 (1 min), 53 (1 min), 72 (2 min)] X35, 72 (10 min)	1340-1349 bp
		FWPtmatKF1/FWPtmatKR522	94 (5 min), [94 (1 min), 50 (1 min), 72 (1 min)] X35, 72 (10 min)	528-534 bp
		FWPtmatK fEDR/FWPtmatKR951	94 (5 min), [94 (1 min), 50 (1 min), 72 (1 min)] X35, 72 (10 min)	589-592 bp
		FWPtmatKF867/FWPtmatK rAGK	94 (5 min), [94 (1 min), 50 (1 min), 72 (1 min)] X35, 72 (10 min)	486 bp
	Deparia	Derps16 fSTE/DematK rHTY	95 (5 min), [95 (0.5 min), 57 (0.5 min), 72 (1.5 min)] X35, 72 (10 min)	1290-1331 bp
		DematK fHVL/FERmatK rAGK	95 (5 min), [95 (0.5 min), 55 (0.5 min), 72 (1 min)] X35, 72 (10 min)	928 bp
rbcL	Cheilanthes marginata group	ESRBCL1F/ESRBCL1361R	94 (5 min), [94 (1 min), 50 (1 min), 72 (2 min)] X35, 72 (10 min)	1361 bp
		ESRBCL1F/FWrbcL500R	94 (5 min), [94 (1 min), 50 (1 min), 72 (1 min)] X35, 72 (10 min)	548 bp
		FWrbcL392F/FWrbcL874R	94 (5 min), [94 (1 min), 50 (1 min), 72 (1 min)] X35, 72 (10 min)	505 bp
		FWrbcL835F/ESRBCL1361R	94 (5 min), [94 (1 min), 50 (1 min), 72 (1 min)] X35, 72 (10 min)	511 bp
	Deparia	F1F/1379R	95 (5 min), [95 (0.5 min), 53 (0.5 min), 72 (1.5 min)] X35, 72 (10 min)	1379 bp
trnH-psbA	Cheilanthes marginata group	psbA/trnH2	94 (5 min), [94 (1 min), 45 (1 min), 72 (1 min)] X35, 72 (10 min)	550-561 bp
	Deparia	psbA fVMH/trnH r5573	95 (5 min), [95 (0.5 min), 53 (0.5 min), 72 (0.75 min)] X35, 72 (10 min)	557-584 bp
trnL-F	Deparia	f/FernLr1	95 (5 min), [95 (0.5 min), 57 (0.5 min), 72 (1 min)] X35, 72 (10 min)	937-857 bp
